# Supplementary material for: Single-Domain Antibodies as Crystallization Chaperones to Enable Structure-Based Inhibitor Development for RBR E3 Ubiquitin Ligases
Source: PubMed Central journal article supplement (PMC6963773; doi:10.1016/j.chembiol.2019.11.007), 2020-01-16

**Data S1 - Related to Compound Synthesis in STAR Methods. Compound NMR and UPLC data.**

2-(Methylamino)-2-oxoethyl (E)-4-(2-oxo-1,2,5,6,7,8-hexahydroquinoline-3-carboxamido)but-2-enoate (4)

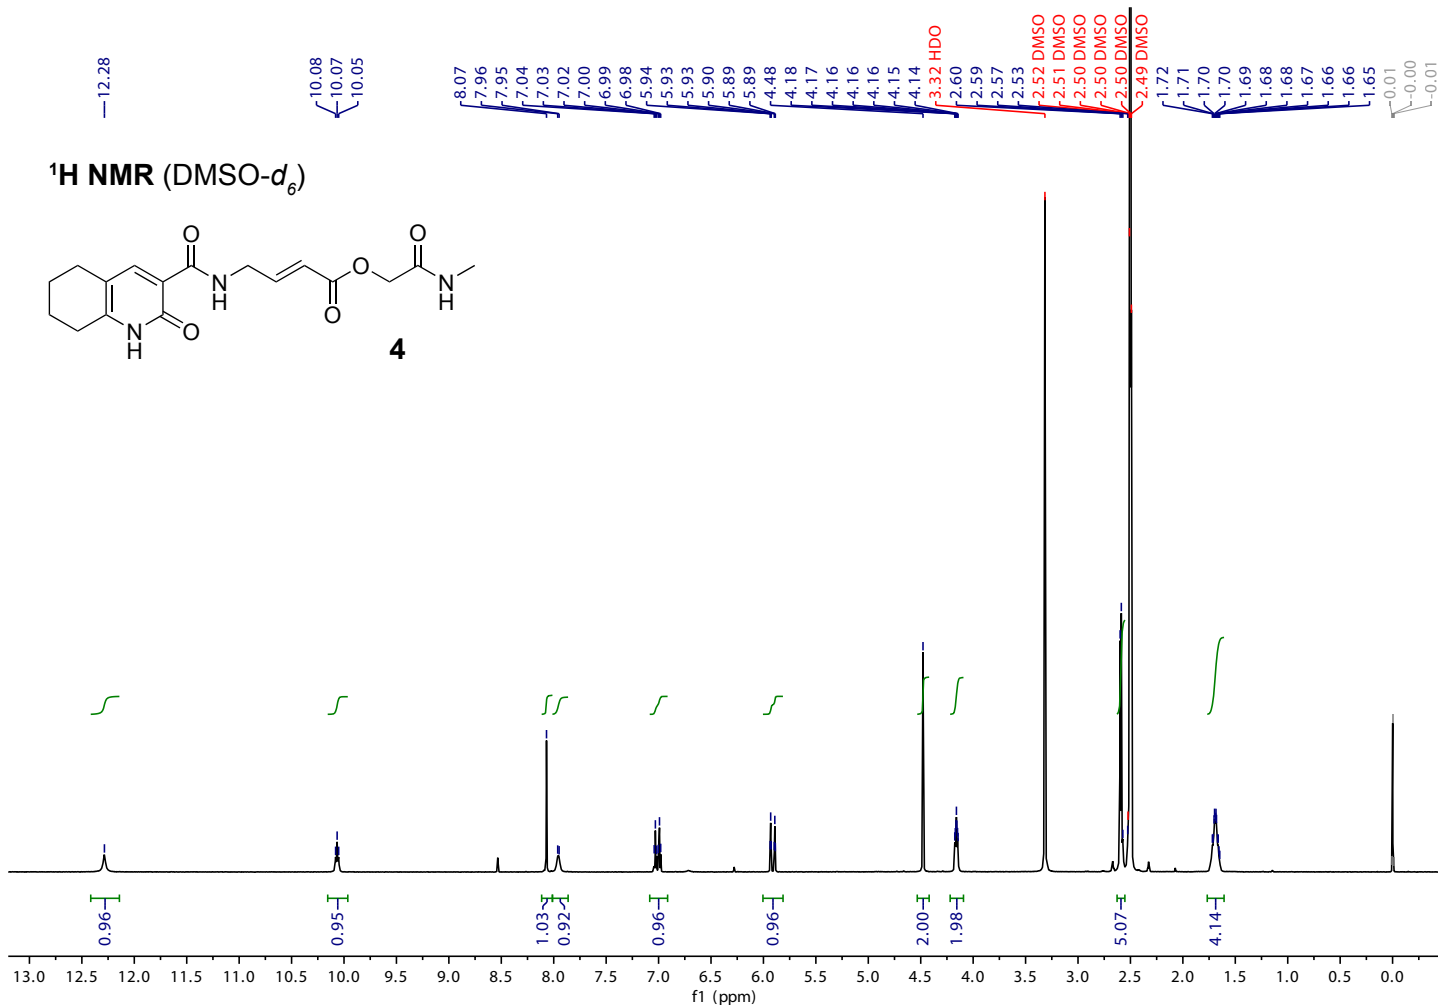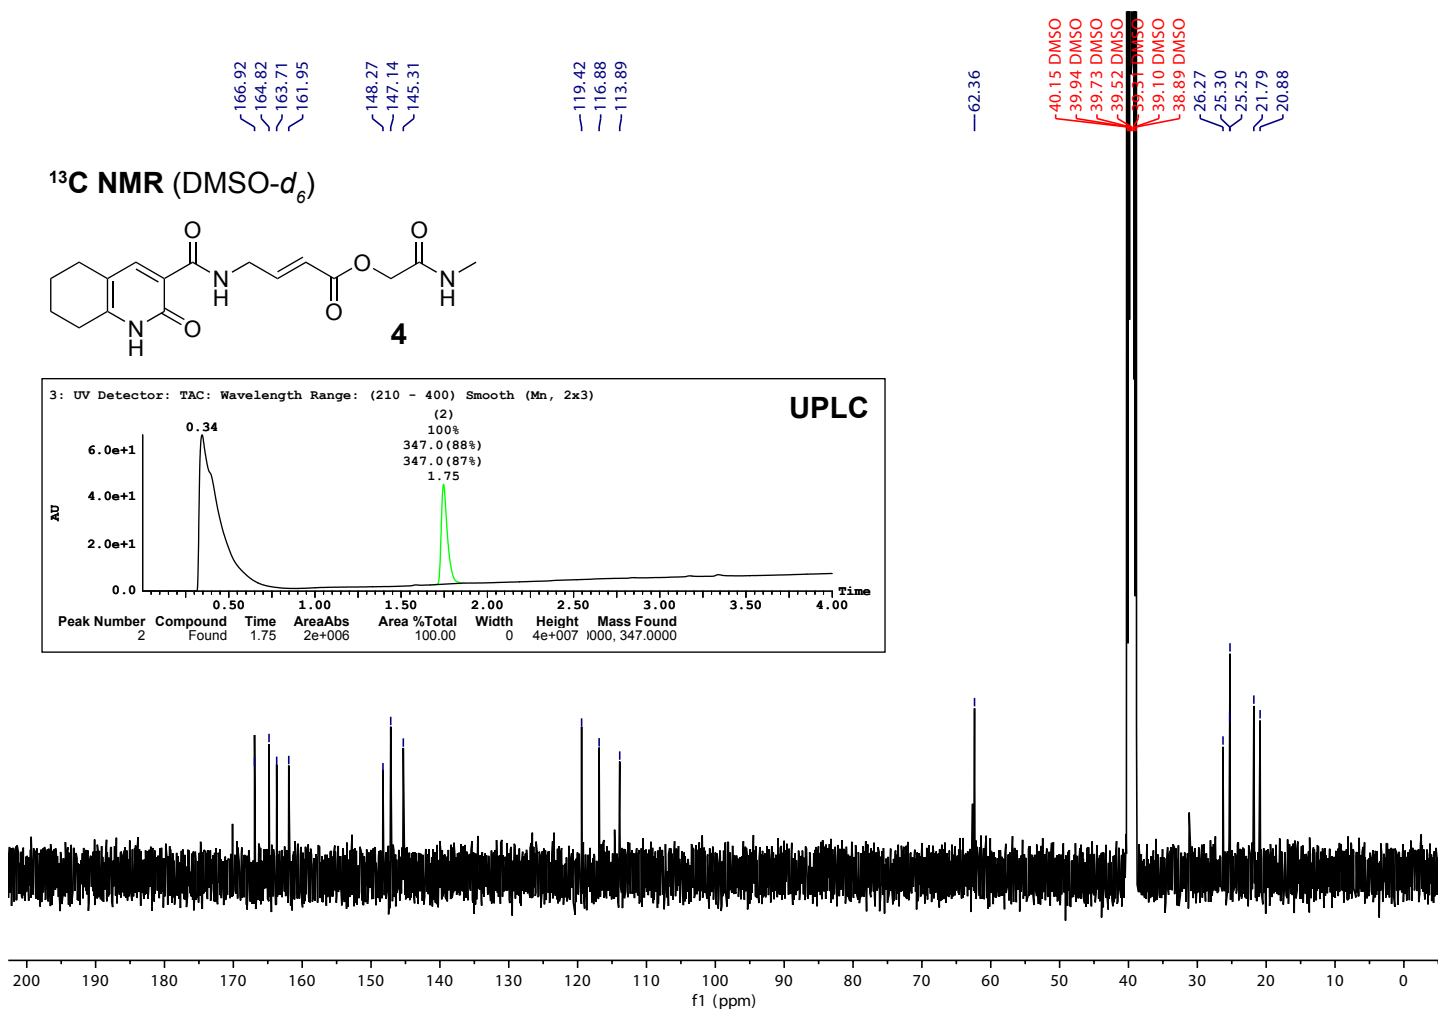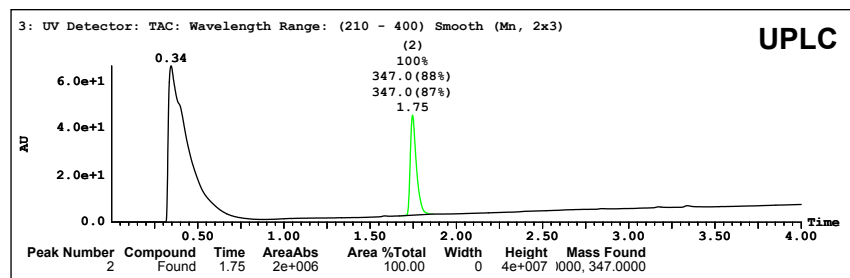

# 3,5-Dibromoisobenzofuran-1(3H)-one (SI-3-1)

7.81  
7.81  
7.80  
7.79  
7.78  
7.77  
7.76  
7.75  
7.27 CDCl<sub>3</sub>

1.57 H<sub>2</sub>O

0.01

## <sup>1</sup>H NMR (CDCl<sub>3</sub>)

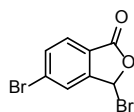

SI-3-1

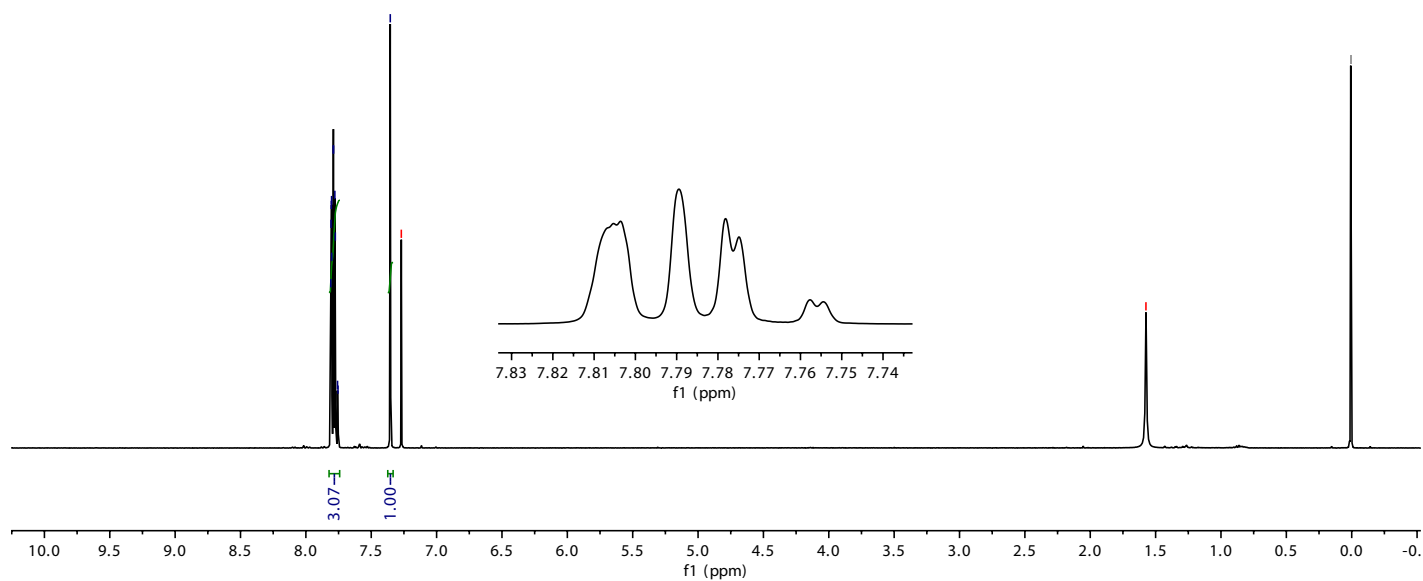

## <sup>13</sup>C NMR (CDCl<sub>3</sub>)

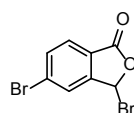

SI-3-1

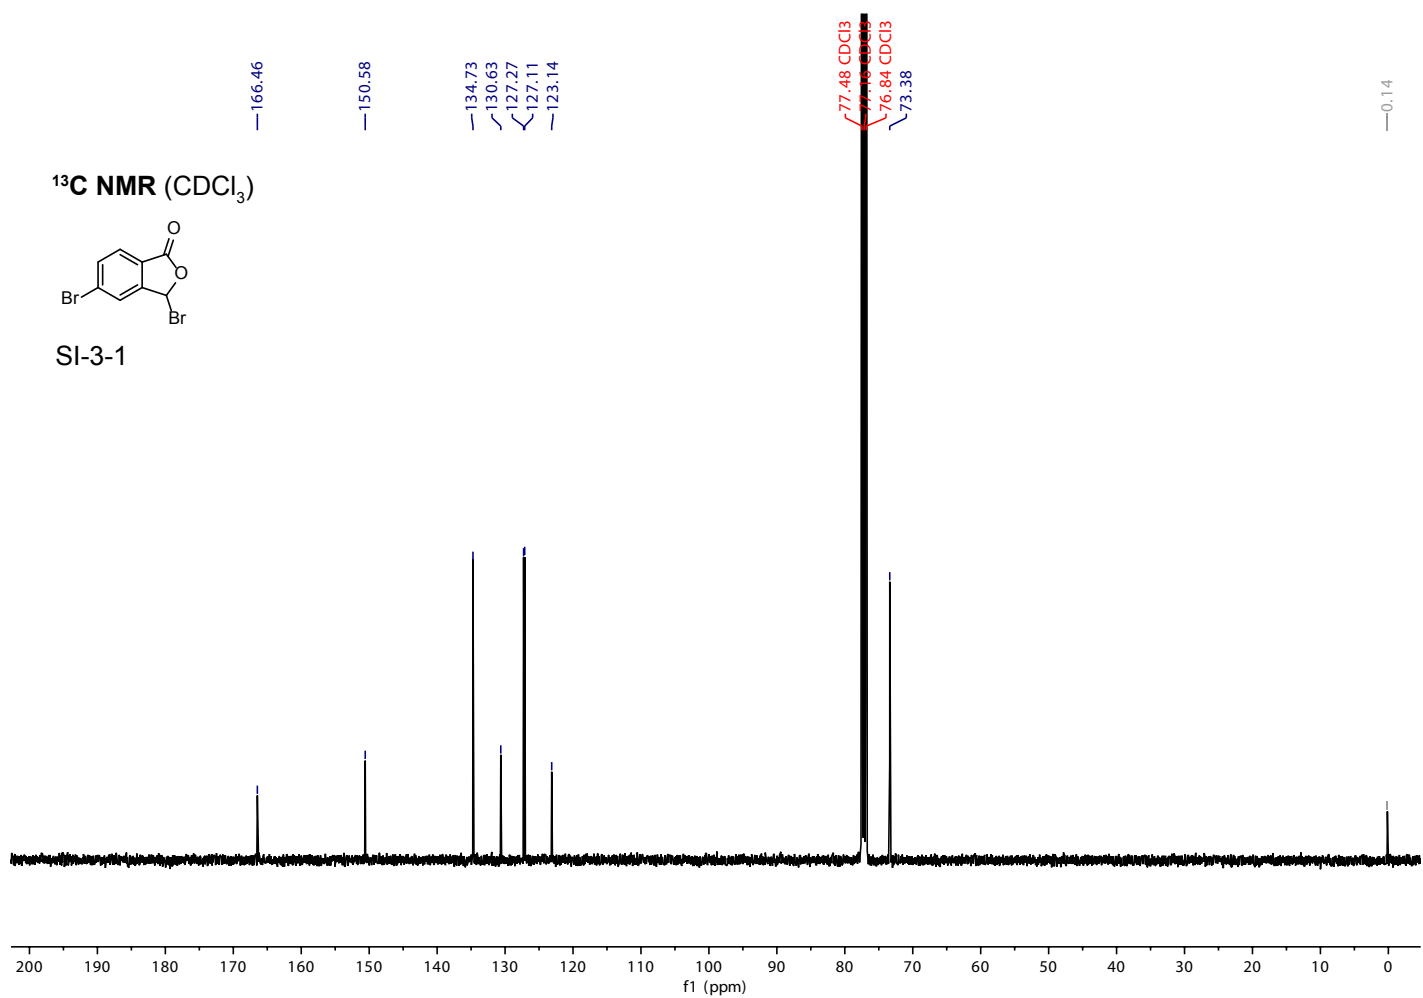

# 5-Bromo-3-hydroxyisobenzofuran-1(3H)-one (SI-3)

## <sup>1</sup>H NMR (DMSO-d<sub>6</sub>)

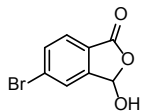

SI-3

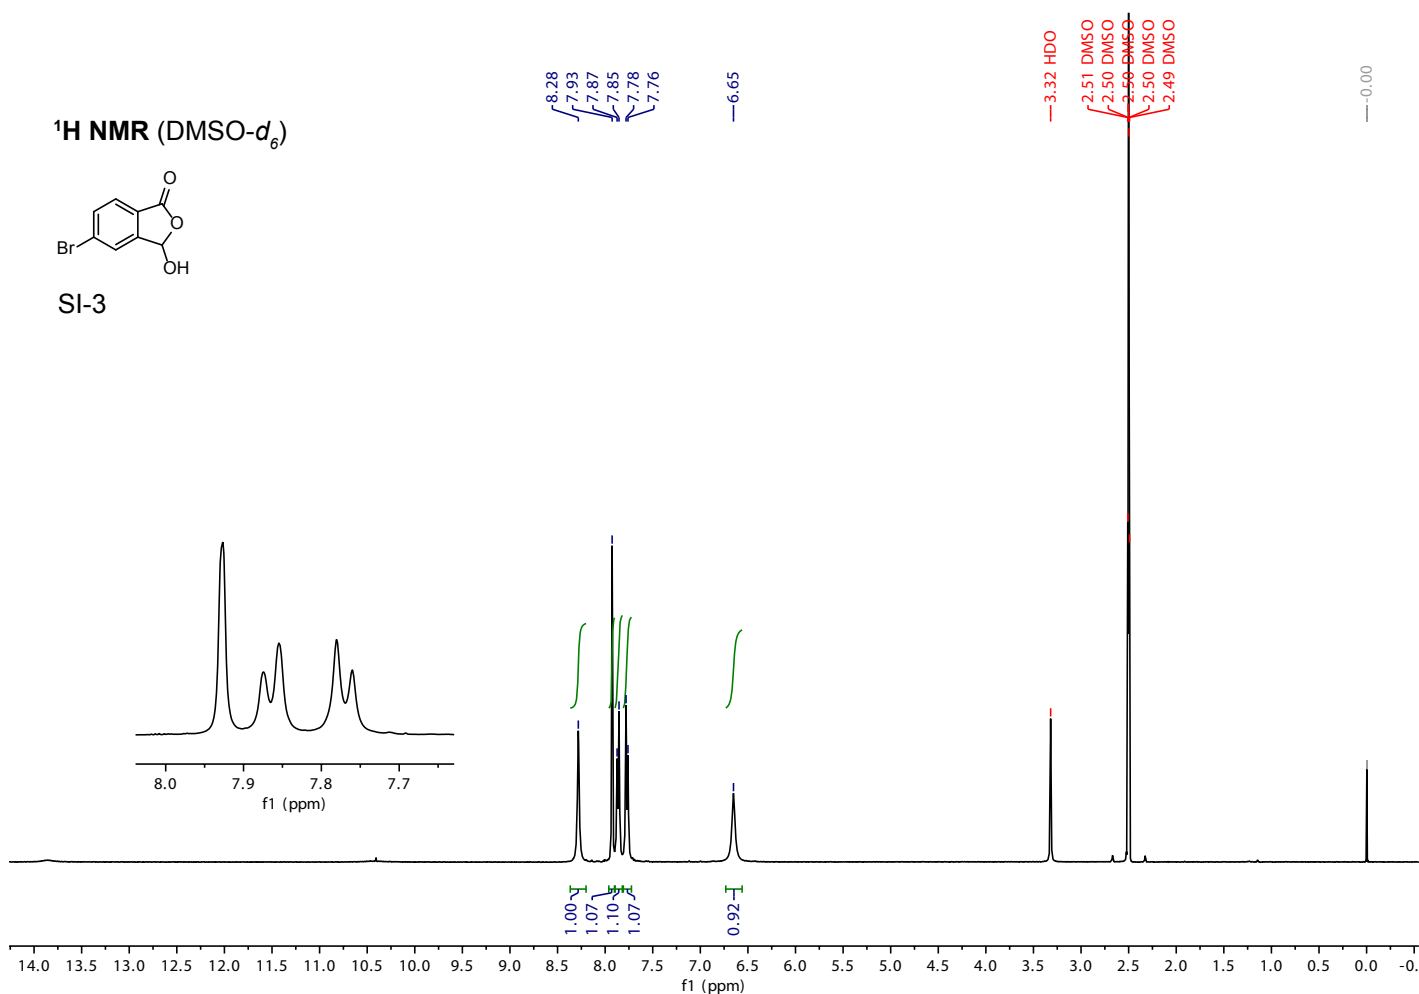

## <sup>13</sup>C NMR (DMSO-d<sub>6</sub>)

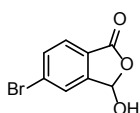

SI-3

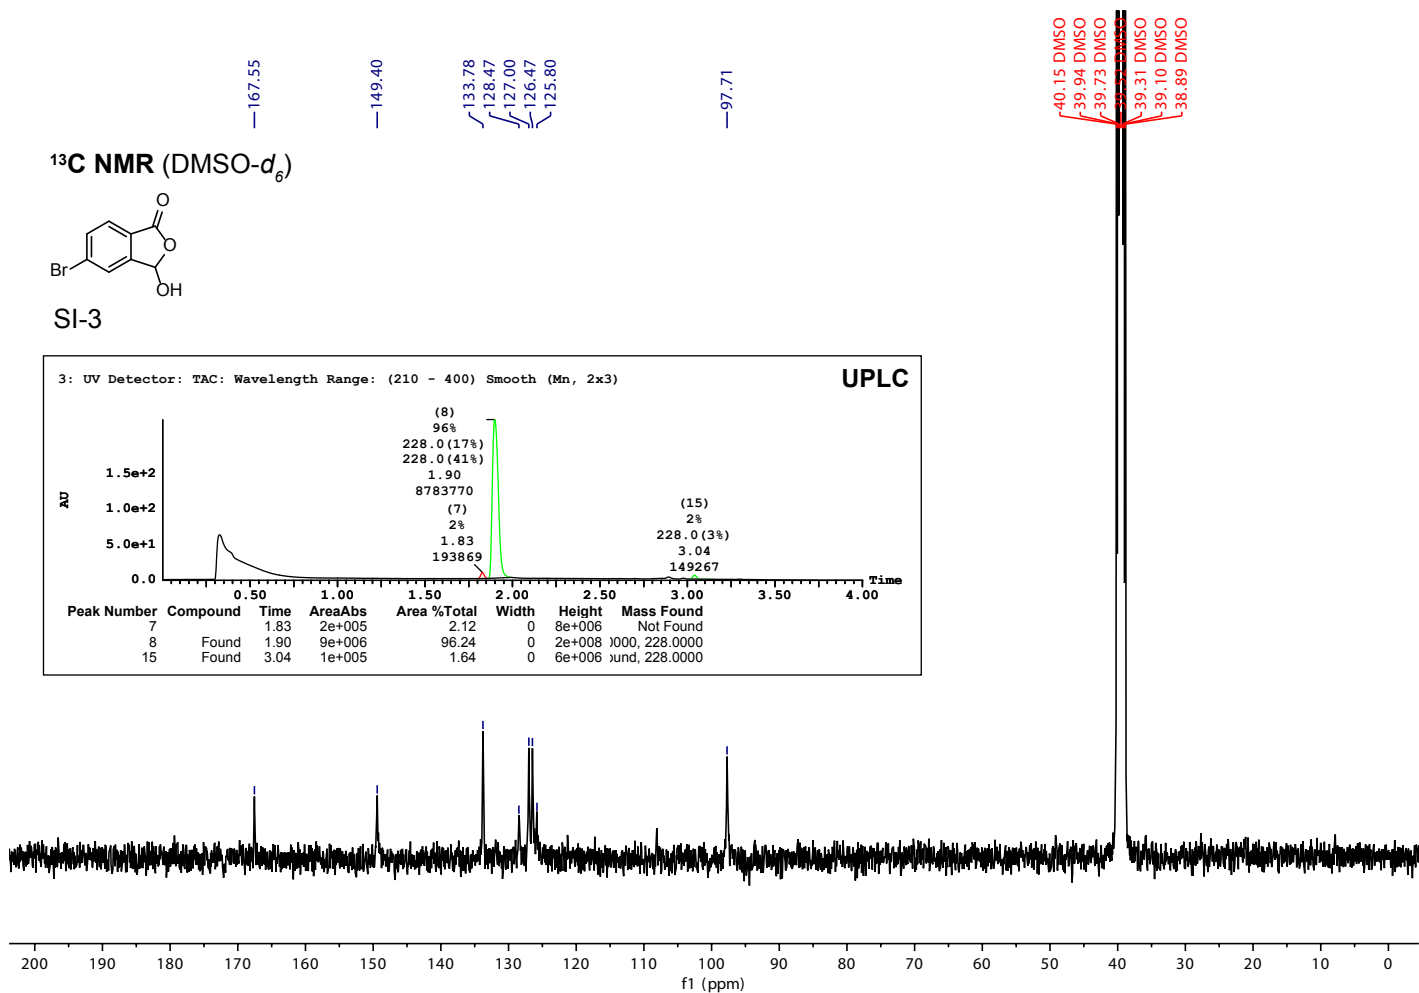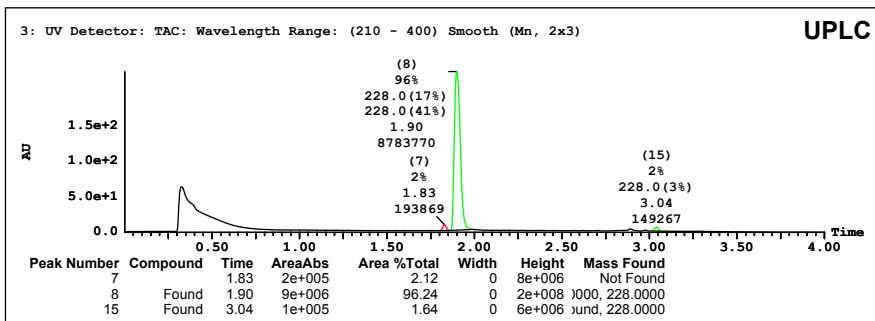

# 3-Hydroxy-5-(1-methyl-1H-pyrazol-4-yl)isobenzofuran-1(3H)-one (SI-4)

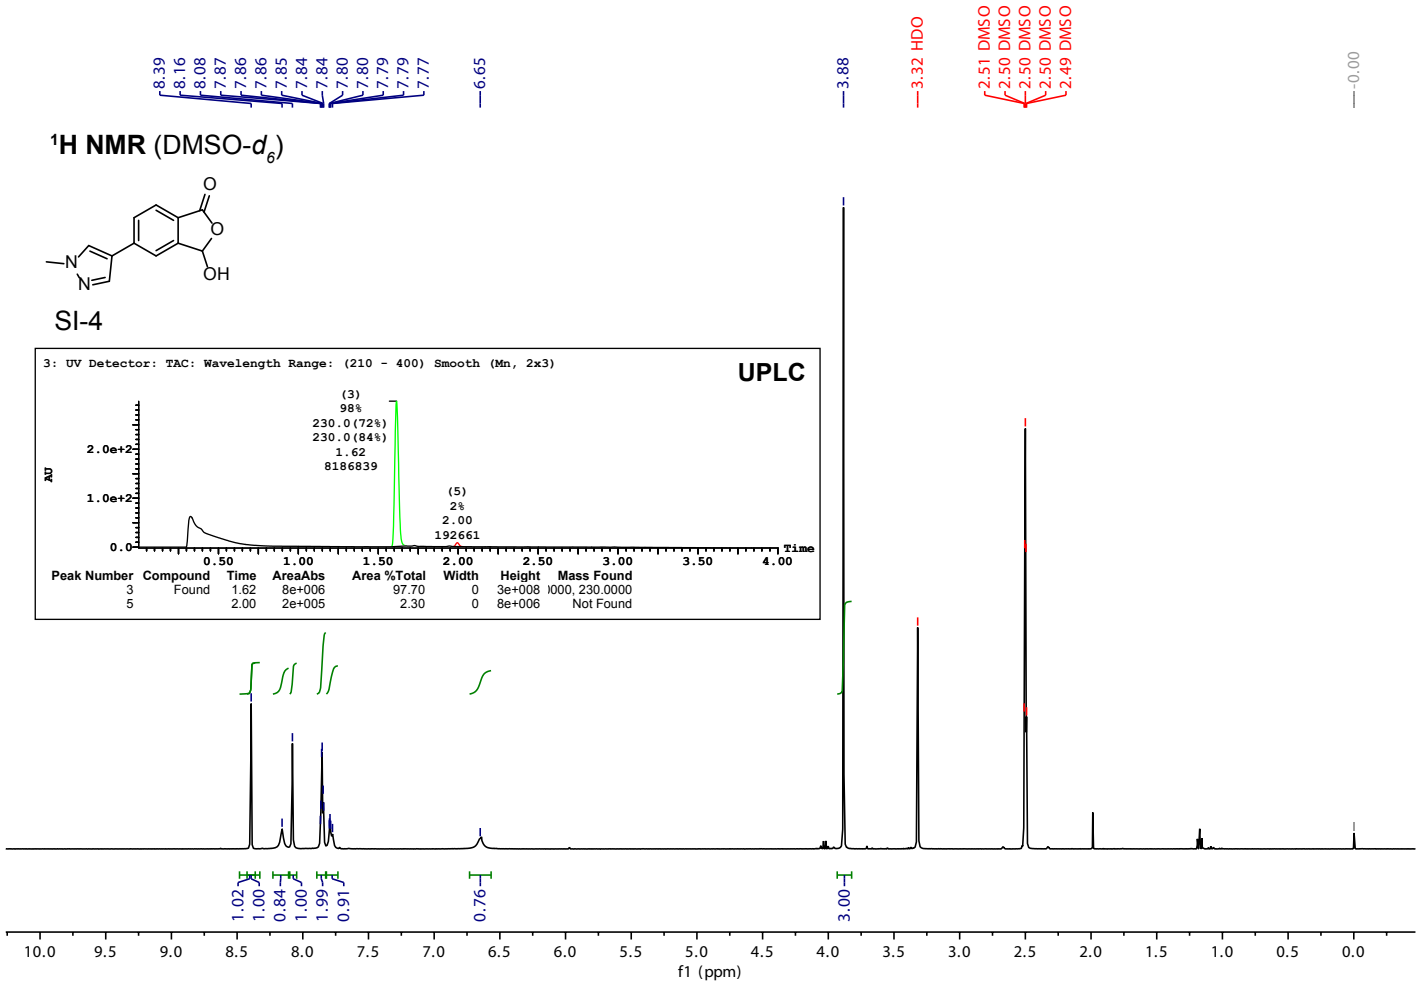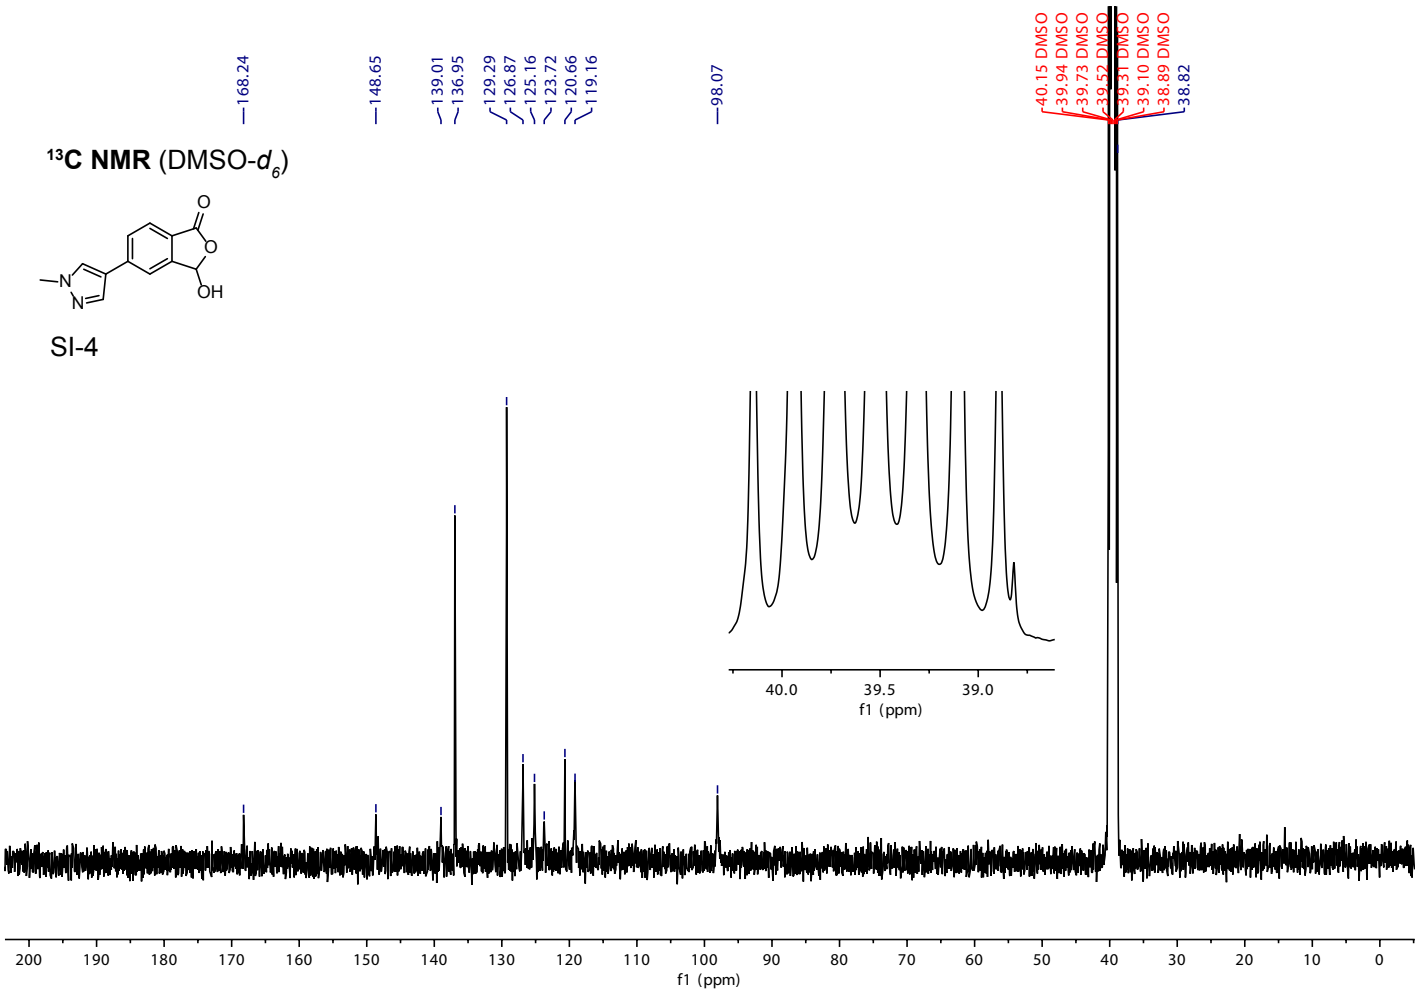



HSQC (DMSO- $d_6$ )

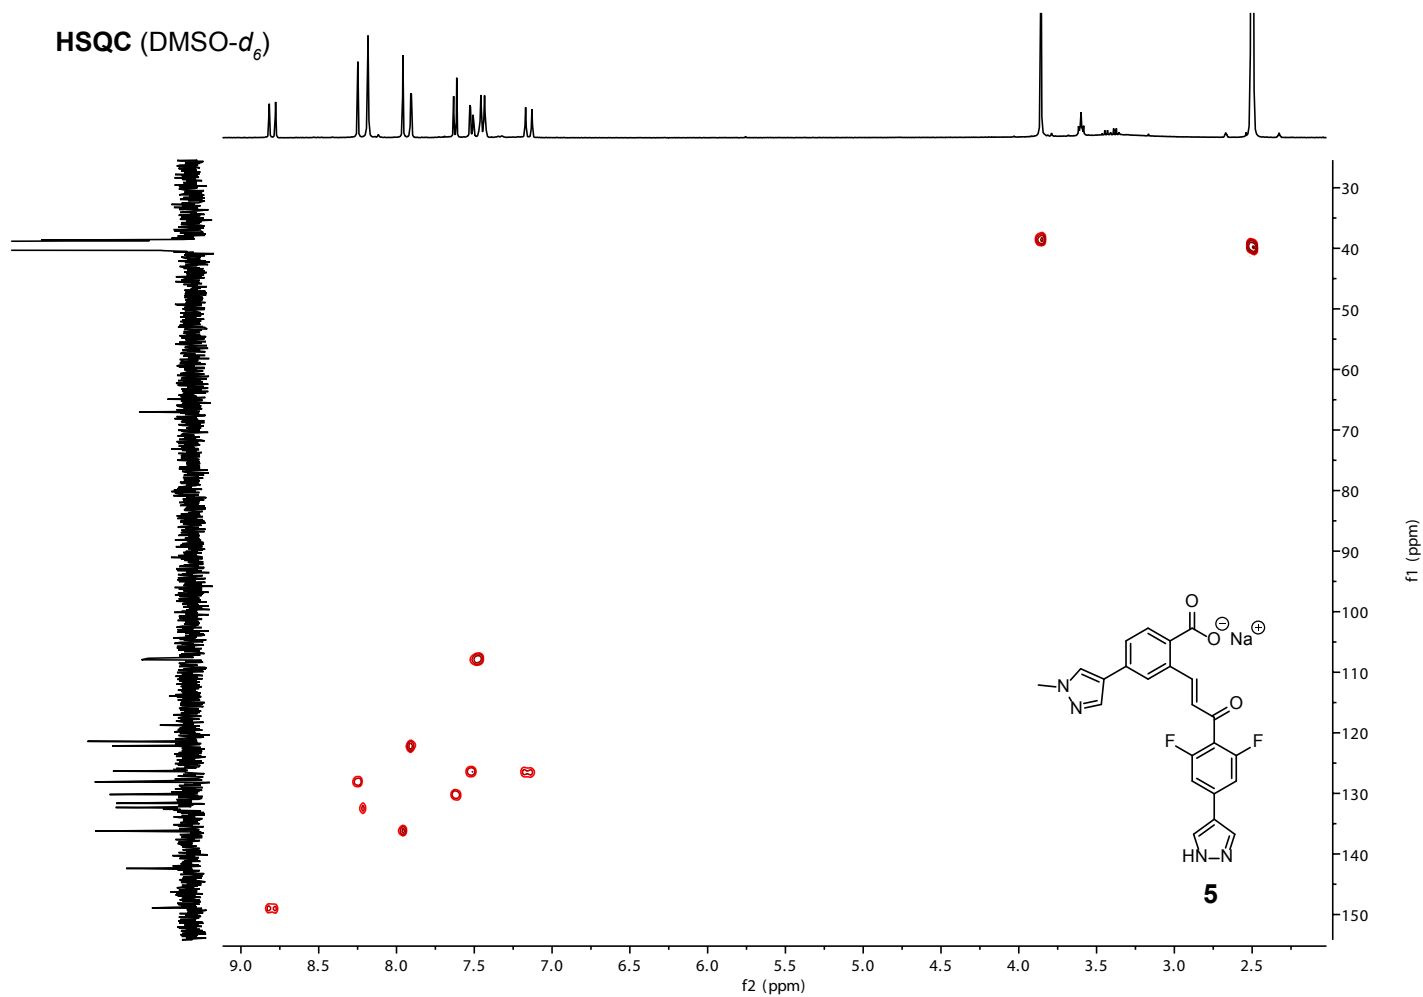

HMBC (DMSO- $d_6$ )

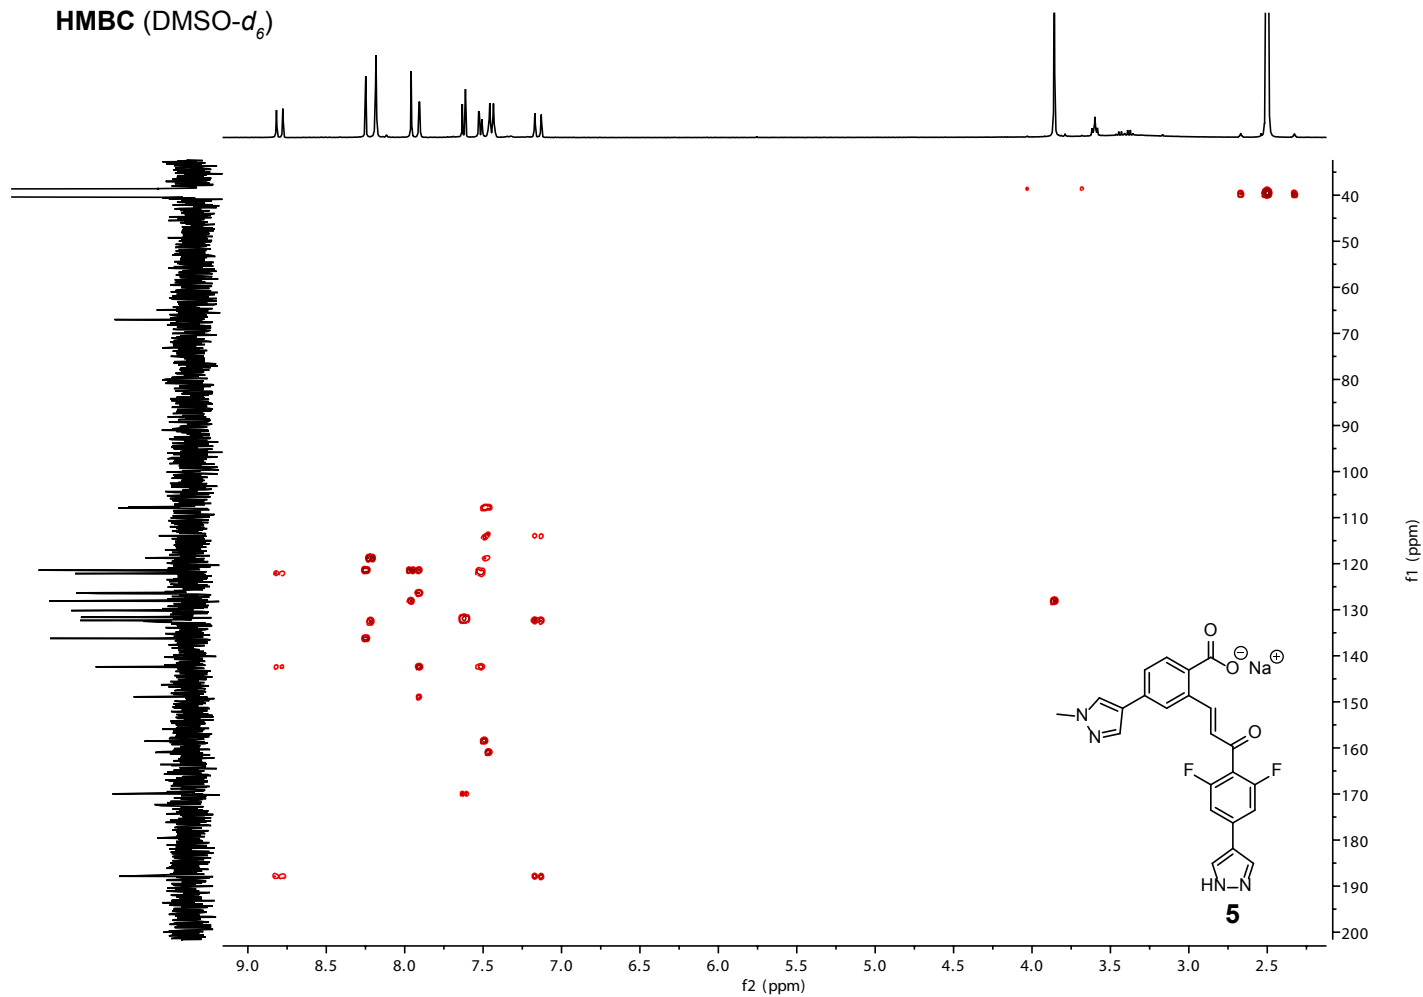

Supplement: mmc2.pdf [file mmc2.pdf]
