# Supplementary material for: Single-Domain Antibodies as Crystallization Chaperones to Enable Structure-Based Inhibitor Development for RBR E3 Ubiquitin Ligases
Source: PubMed Central journal article supplement (PMC6963773; doi:10.1016/j.chembiol.2019.11.007), 2020-01-16
Supplement: mmc3.pdf [file mmc3.pdf]

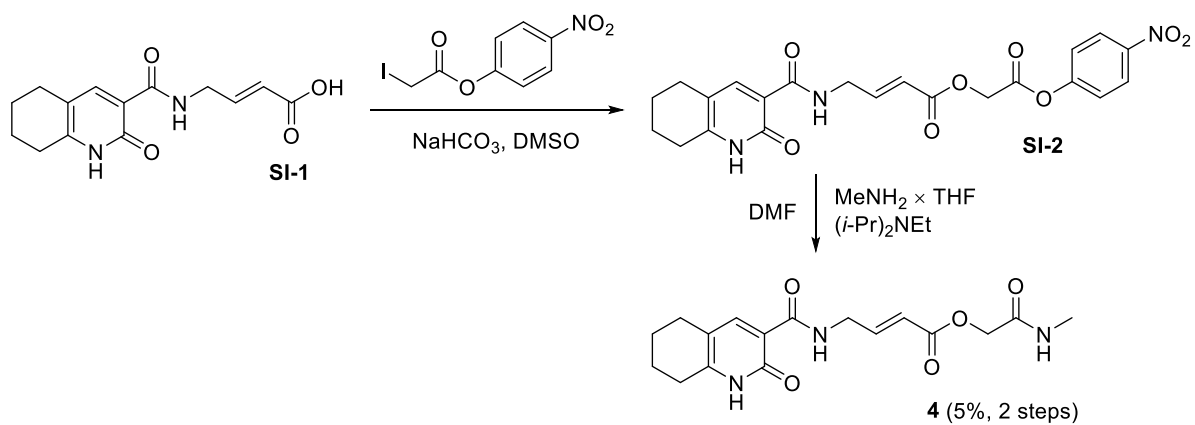

**Scheme S1.** Two-step synthesis of amide **4** from (*E*)-4-(2-oxo-1,2,5,6,7,8-hexahydroquinoline-3-carboxamido)but-2-enoic acid **SI-1**.
