# Supplementary material for: Single-Domain Antibodies as Crystallization Chaperones to Enable Structure-Based Inhibitor Development for RBR E3 Ubiquitin Ligases
Source: PubMed Central journal article supplement (PMC6963773; doi:10.1016/j.chembiol.2019.11.007), 2020-01-16
Supplement: mmc4.pdf [file mmc4.pdf]

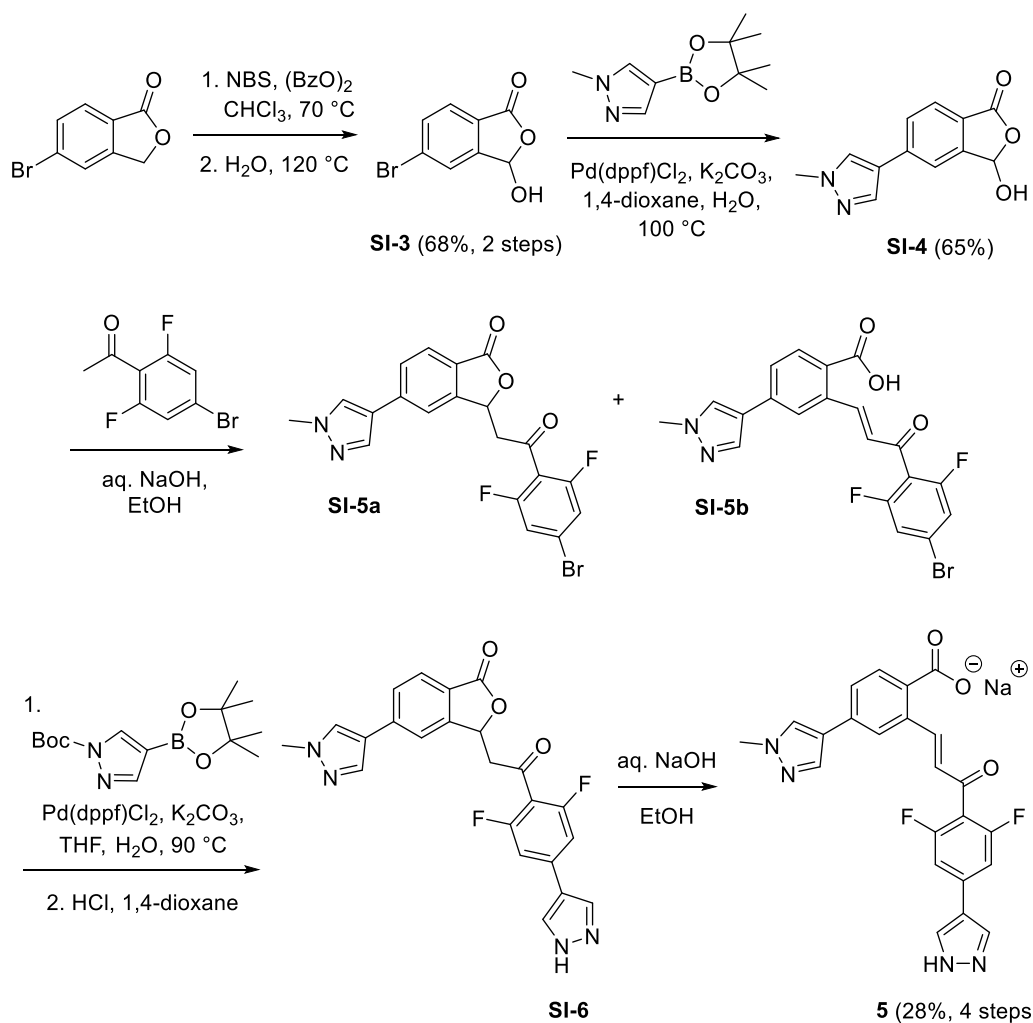

**Scheme S2.** Synthesis of inhibitor **5** (HOIPIN-8) according to the procedure reported by Katsuya *et al.* (Katsuya *et al.*, 2019) Boc = *tert*-butyloxycarbonyl; Bz = benzoyl; dppf = 1,1'-Bis(diphenylphosphino)ferrocene; NBS = *N*-bromosuccinimide.
